# Supplementary material for: Novel metallic electrically heated monolithic catalysts towards VOC combustion
Source: Royal Society of Chemistry journal article supplement (doi:10.1039/c9cy01477b), 2019-01-01
Supplement: c9cy01477b1.pdf [file c9cy01477b1.pdf]

## Supporting Information

### Novel metallic electric heating monolithic catalyst towards VOCs combustion

Qiulian Zhu,<sup>a</sup> Hao Li,<sup>a</sup> Yue Wang,<sup>a</sup> Ying Zhou,<sup>a</sup> Anming Zhu,<sup>a</sup> Xiao Chen,<sup>ab</sup> Xiaonian Li,<sup>a</sup> Yinfei Chen<sup>a</sup> and Hanfeng Lu<sup>\*a</sup>

---

<sup>a</sup> Innovation team of air pollution control, Institute of Catalytic Reaction Engineering, College of Chemical Engineering, Zhejiang University of Technology, Hangzhou 310014, China. E-mail: [luhf@zjut.edu.cn](mailto:luhf@zjut.edu.cn); Tel: +86 571 88320767

<sup>b</sup> Institute of Environmental Chemicals and Resources, College of environment, Zhejiang University of Technology, Hangzhou 310014, China

\* Corresponding authors: Hanfeng Lu, [luhf@zjut.edu.cn](mailto:luhf@zjut.edu.cn), +86 571 88320767, Zhejiang University of Technology, 18 Chaowang Road, Hangzhou 310014, China.

**Supplementary Table 1** The adherence test of FeCrAl monoliths

| Sample          | Before ultrasound(g) | After ultrasound(g) | $\delta$ (wt%) <sup>a</sup> |
|-----------------|----------------------|---------------------|-----------------------------|
| Calcined FeCrAl | 2.0781               | 2.0779              | 6.45                        |
| 0.1Pt/FeCrAl    | 2.0767               | 2.0756              | 5.31                        |
| 0.1Pd/FeCrAl    | 2.0799               | 2.0795              | 1.97                        |

<sup>a</sup> Weight lost in adherence test ( $\delta$ )

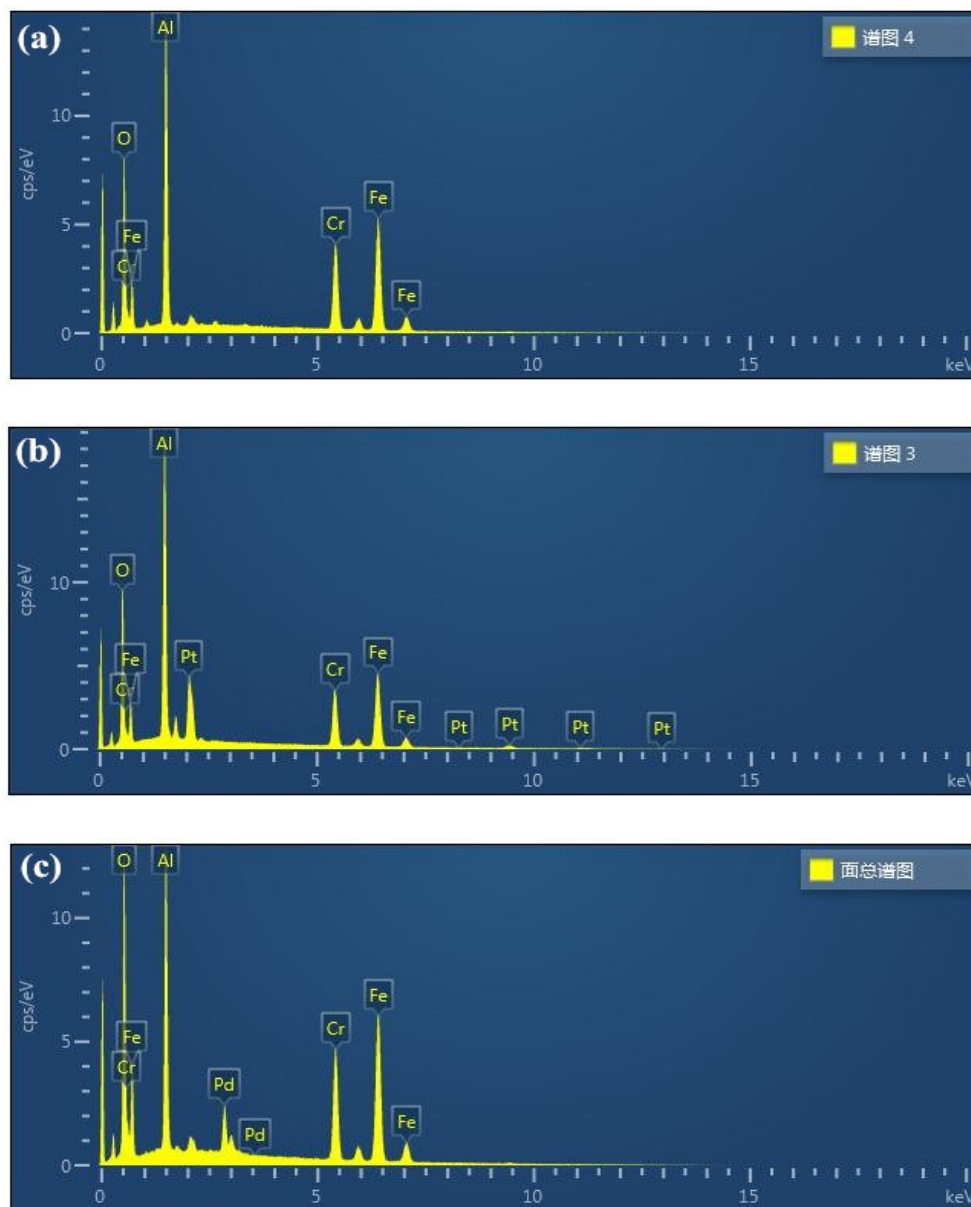

**Supplementary Fig. 1** The EDS images of FeCrAl monoliths. (a) Calcined FeCrAl; (b) 0.1Pt/FeCrAl; (c) 0.1Pd/FeCrAl.

It demonstrated that a alumina coating was formed on the surface of FeCrAl metallic substrate. In addition, Pt and Pd bonded with metallic substrate.

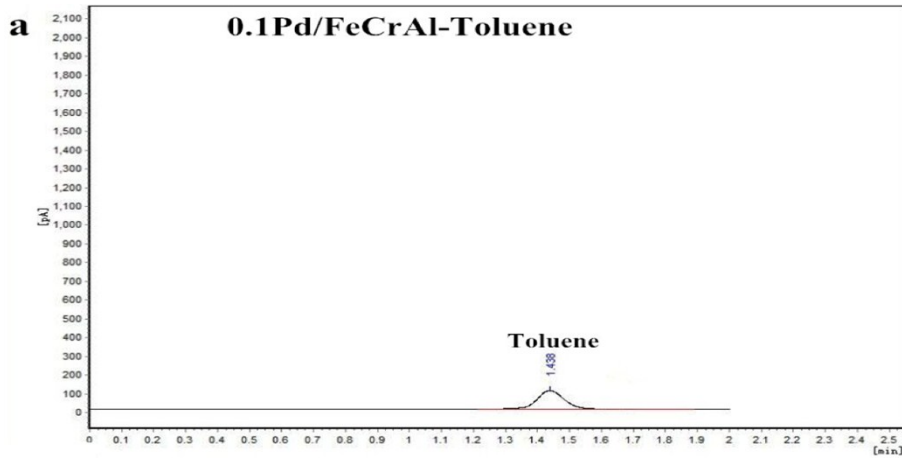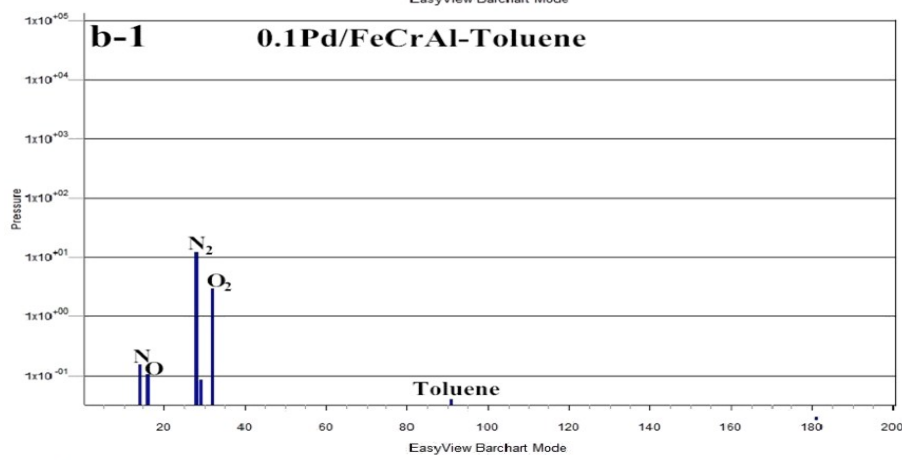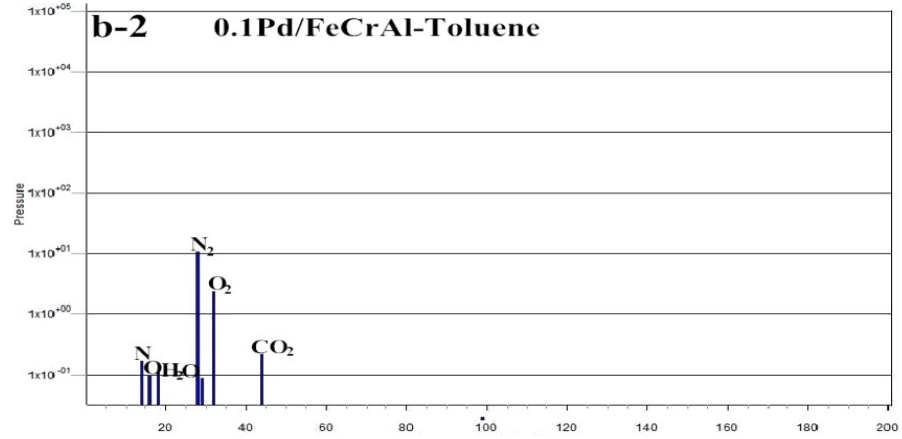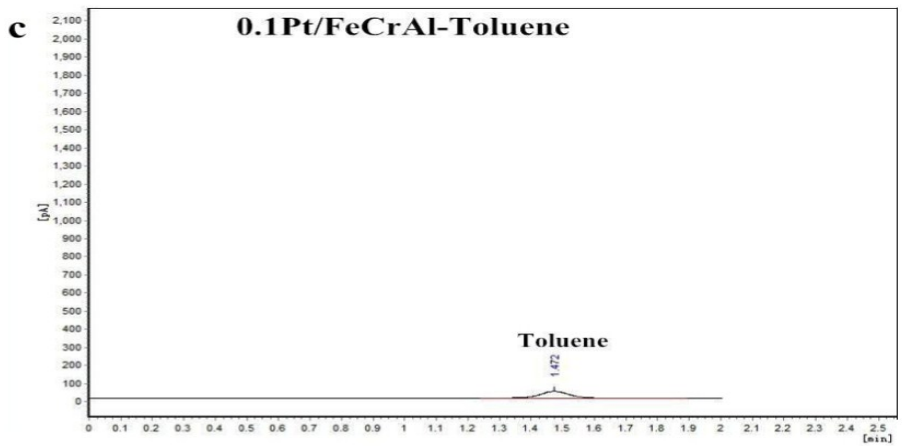

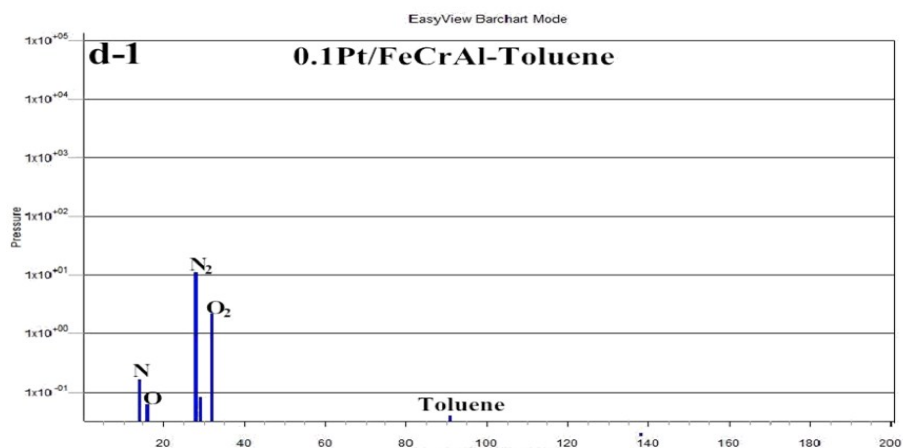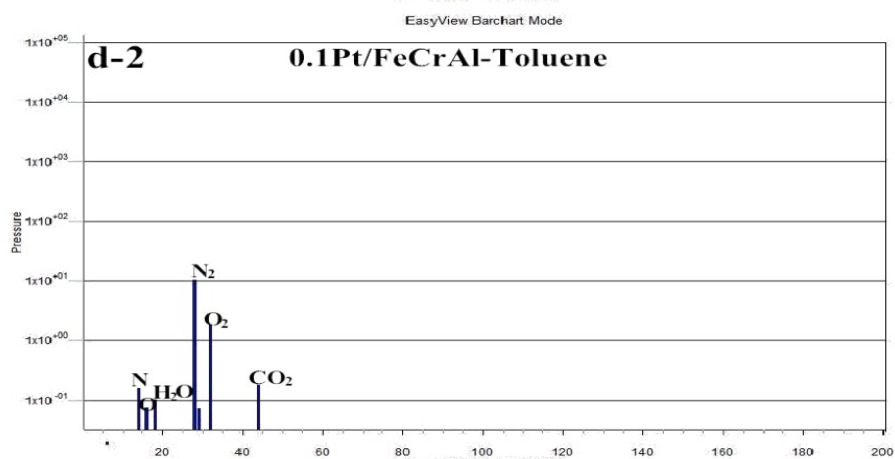

**Supplementary Fig. 2** GC (a, c) and MS (b, d) tested results of toluene combustion over 0.1Pd/FeCrAl and 0.1Pt/FeCrAl.

As shown in Fig. S2a and 2c, it demonstrated that catalytic combustion of toluene does not produce other products. In addition, the MS results (Fig. S2b, d) showed the product of catalytic combustion of toluene is CO<sub>2</sub> and H<sub>2</sub>O.

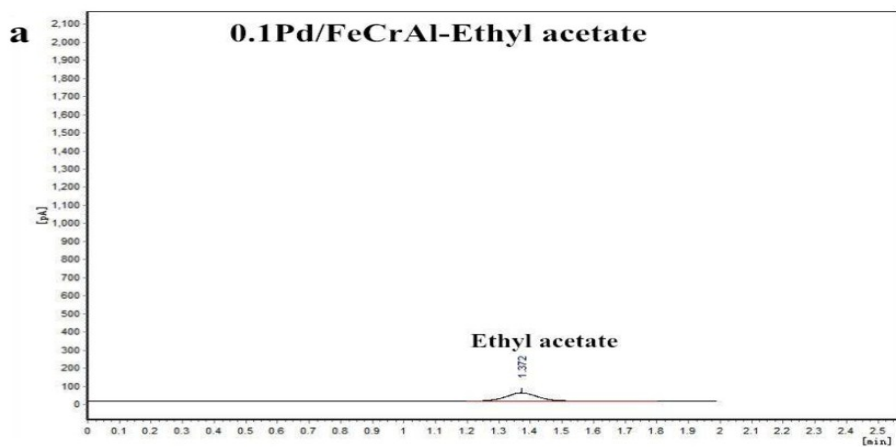

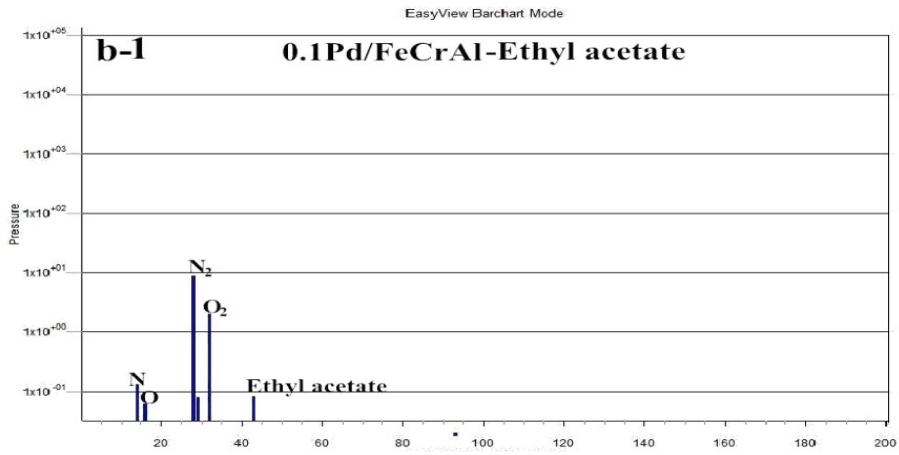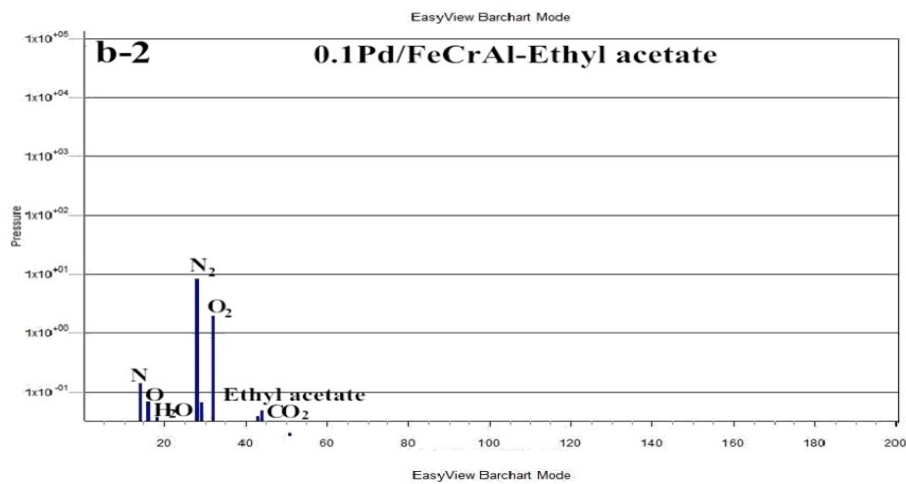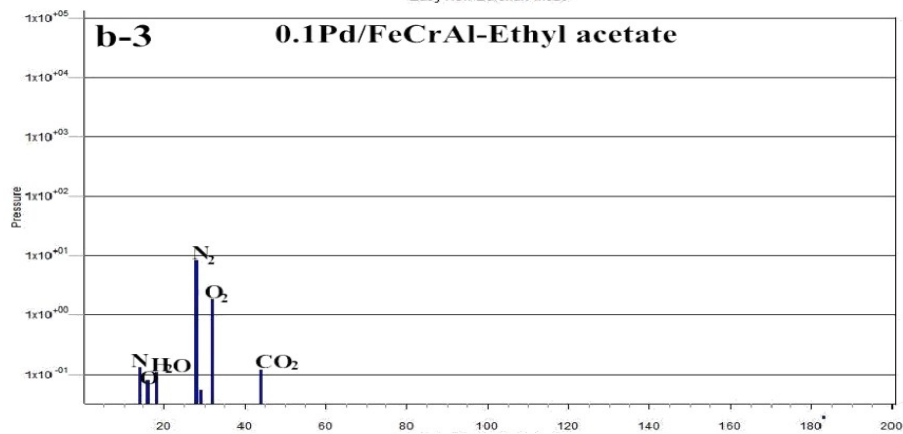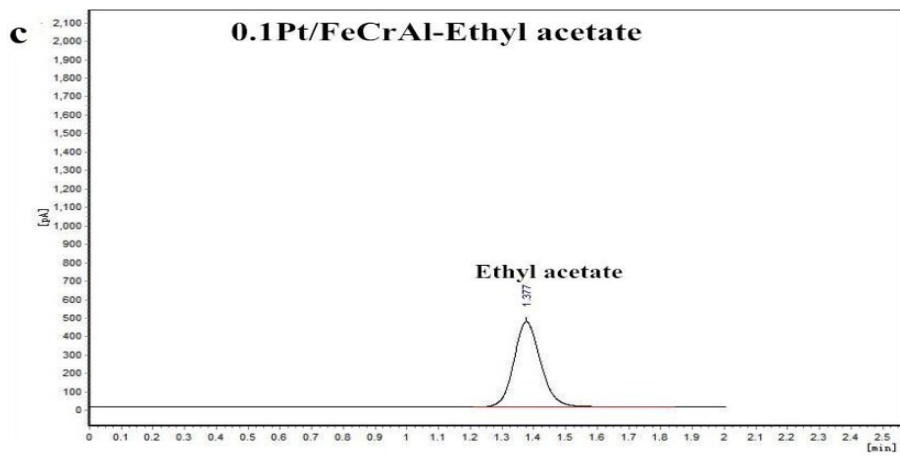

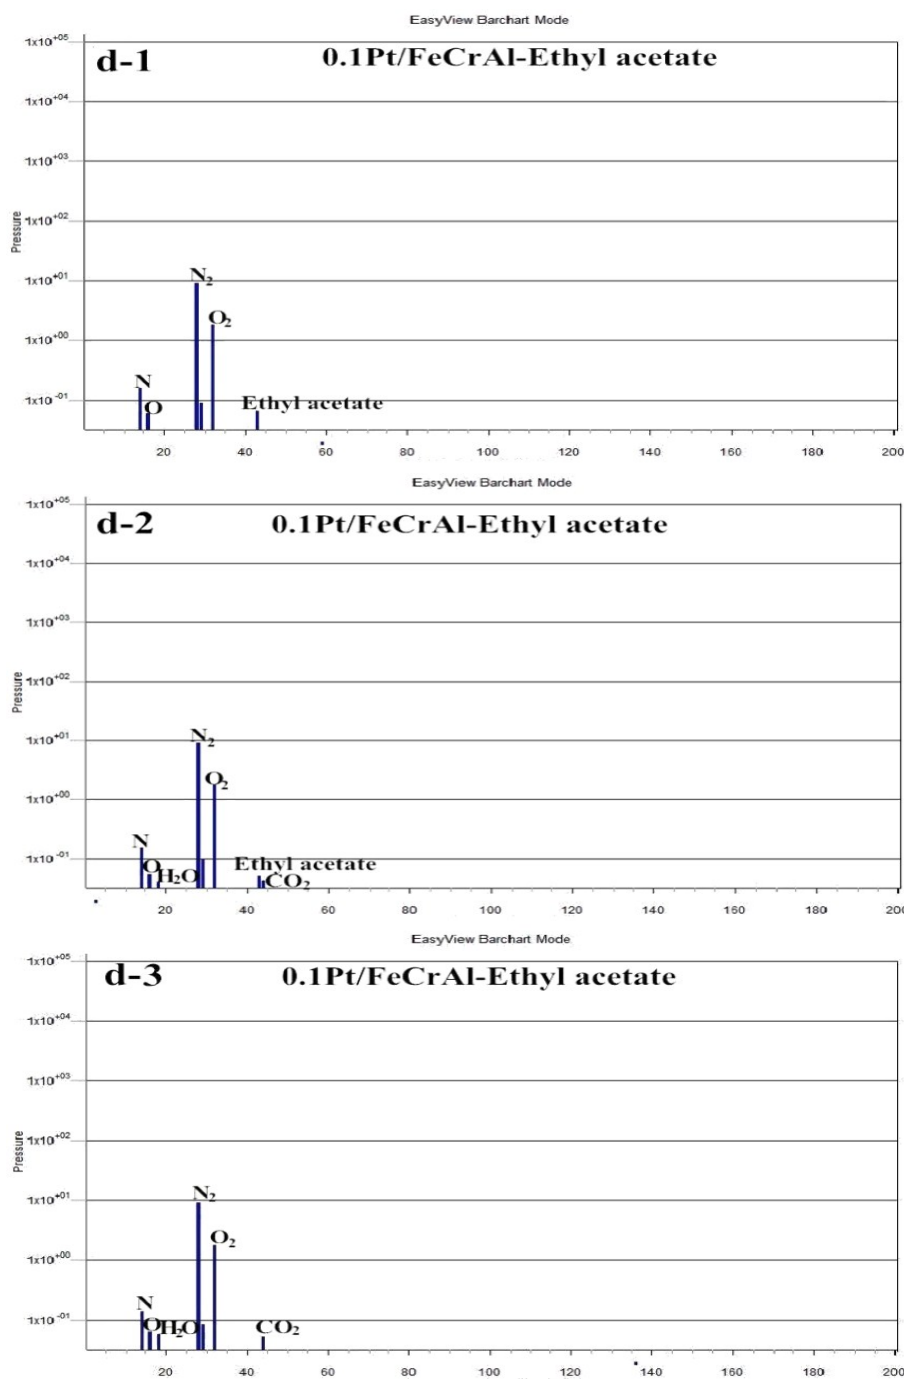

**Supplementary Fig. 3** GC (a, c) and MS (b, d) tested results of ethyl acetate combustion over 0.1Pd/FeCrAl and 0.1Pt/FeCrAl.

As shown in Fig. S3a and 3c, it demonstrated that catalytic combustion of ethyl acetate does not produce other products. In addition, the MS results (Fig. S3b, d) showed the product of catalytic combustion of ethyl acetate is CO<sub>2</sub> and H<sub>2</sub>O. However, ethyl acetate combustion is more difficult than that of toluene.

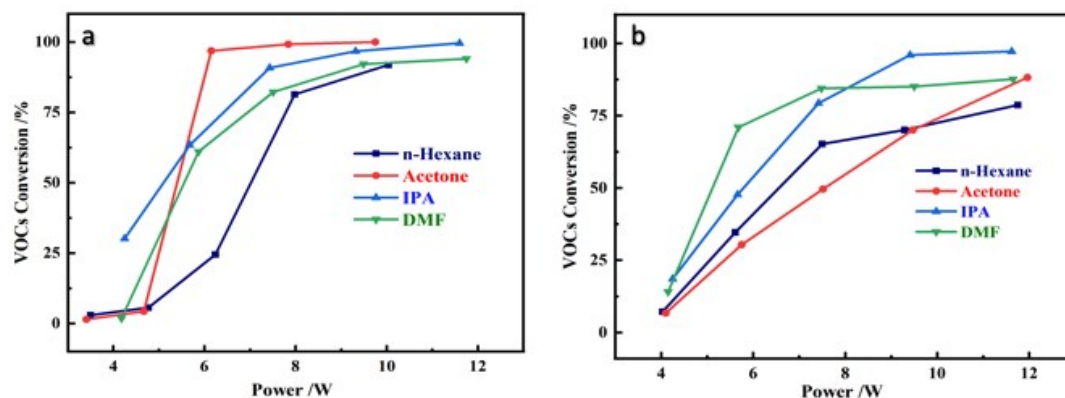

**Supplementary Fig. 4** Light-off curves of VOCs combustion. (a) 0.1Pd/FeCrAl; (b) 0.1Pt/FeCrAl. Other Condition: VOCs concentration of 2500 ppm, WHSV of 10000 mL·h<sup>-1</sup>·g<sup>-1</sup>.

We tested the catalytic activities in the combustion of acetone, n-hexane, isopropyl alcohol (IPA), N,N-Dimethylformamide (DMF). The monolithic catalysts exhibited the excellent activity for VOCs, suggesting our catalysts are suitable to deal with most VOCs.

**Supplementary Tab. 2** Catalytic oxidation of VOCs over Pt and Pd alumina-supported catalysts.

| Catalyst                                   | VOCs                 | concentratio<br>n / ppm | Space velocity                                | T90<br>/ °C     | Reference        |            |
|--------------------------------------------|----------------------|-------------------------|-----------------------------------------------|-----------------|------------------|------------|
| Pt/Al <sub>2</sub> O <sub>3</sub>          | Toluene              | 300                     | 30000 mL·h <sup>-1</sup> ·g <sup>-1</sup>     | 200             | [1]              |            |
| 0.12 wt% Pt/Al <sub>2</sub> O <sub>3</sub> | n-Hexane             | 1500                    | 13001 h <sup>-1</sup>                         | >260            | [2]              |            |
| Pt/Al <sub>2</sub> O <sub>3</sub> /Al      | Toluene              | 225                     | 3680 h <sup>-1</sup>                          | 200             | [3]              |            |
|                                            | Acetone              |                         |                                               | 282             |                  |            |
| 0.3% Pt/γ-Al <sub>2</sub> O <sub>3</sub>   | Ethyl acetate        | 2000                    | 3000 h <sup>-1</sup>                          | 310             | [4]              |            |
|                                            |                      |                         |                                               | <b>Toluene</b>  |                  | <b>242</b> |
|                                            |                      |                         |                                               | <b>n-Hexane</b> |                  | <b>295</b> |
| <b>0.1Pt/FeCrAl</b>                        | <b>Ethyl acetate</b> | <b>2500</b>             | <b>10000 mL·h<sup>-1</sup>·g<sup>-1</sup></b> | <b>374</b>      | <b>This Work</b> |            |
| <b>Acetone</b>                             |                      |                         | <b>300</b>                                    |                 |                  |            |
| 1 wt% Pd/Al <sub>2</sub> O <sub>3</sub>    | Toluene              | 1000                    | 15000 h <sup>-1</sup>                         | 190             |                  | [5]        |
| Pd/Al <sub>2</sub> O <sub>3</sub>          | o-Xylene             | 100                     | 50000 h <sup>-1</sup>                         | 145             | [6]              |            |
| 0.3% Pd/γ-Al <sub>2</sub> O <sub>3</sub>   | Ethyl acetate        | 2000                    | 30000 h <sup>-1</sup>                         | 272             | [4]              |            |
| 1 wt% Pd/γ-Al <sub>2</sub> O <sub>3</sub>  | Toluene              | 1000                    | 28000 h <sup>-1</sup>                         | 240             | [7]              |            |
|                                            | <b>Toluene</b>       |                         |                                               | <b>250</b>      |                  |            |
| <b>0.1Pd/FeCrAl</b>                        | <b>Ethyl acetate</b> | <b>2500</b>             | <b>10000 mL·h<sup>-1</sup>·g<sup>-1</sup></b> | <b>328</b>      | <b>This work</b> |            |

We reported the preparation of novel electrically heated monolithic Pt or Pd catalysts supported on FeCrAl metal wire, the catalysts exhibited high catalytic activity for the combustion of VOCs to CO<sub>2</sub> and H<sub>2</sub>O under low-current of DC power. Different from

traditional catalytic combustion of VOCs, the power is an indicator of catalytic activity instead of temperature. However, the temperature of electrically heated monolithic catalysts was measured by thermocouple, and the temperature refers to the surface temperature of catalysts. Therefore, the temperature of electrically heated monolithic catalysts is higher than traditional catalysts, in other words, the temperature of our catalysts is higher than literature. Further, the Pt and Pd loadings of our catalysts are extremely low. The catalysts exhibited high catalytic activity for the combustion of VOCs to CO<sub>2</sub> and H<sub>2</sub>O under low-current of DC power. In summary, our Pt and Pd catalysts exhibited superior performance for catalytic combustion of VOCs.

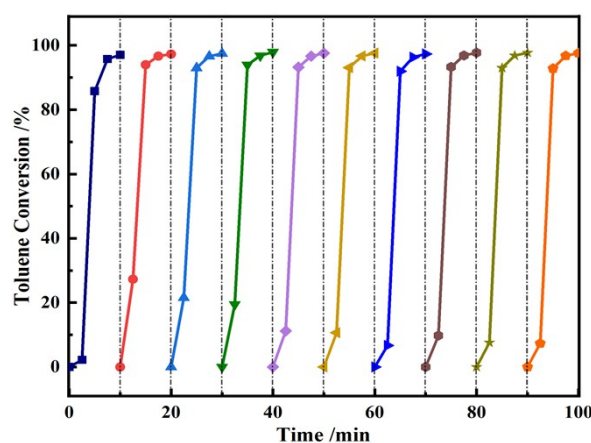

**Supplementary Fig. 5** The reusability of 0.1Pd/FeCrAl for toluene combustion ( $I=0.9A$ ). Condition: toluene concentration of 2500 ppm, WHSV of 10000 mL·h<sup>-1</sup>·g<sup>-1</sup>. It can be seen that 0.1Pd/FeCrAl reached 100% for toluene combustion after 10 cycles.

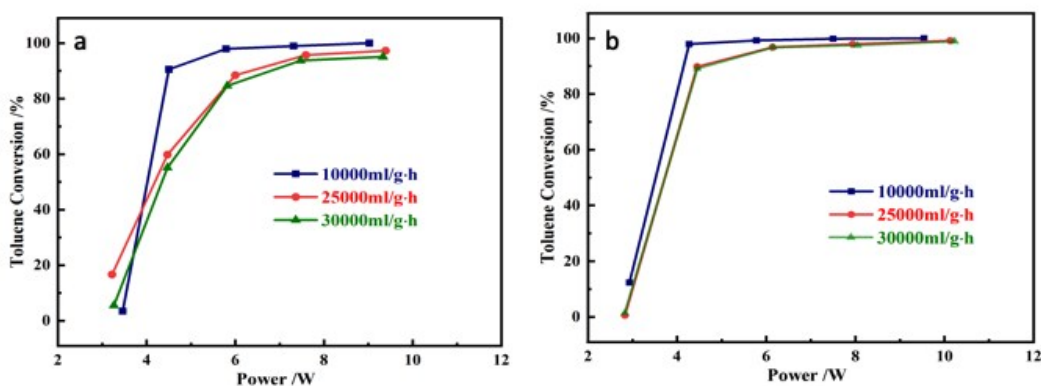

**Supplementary Fig. 6** Effect of space velocity on toluene combustion over (a) 0.1Pd/FeCrAl and (b) 0.1Pt/FeCrAl. Other condition: toluene concentration of 2500 ppm.



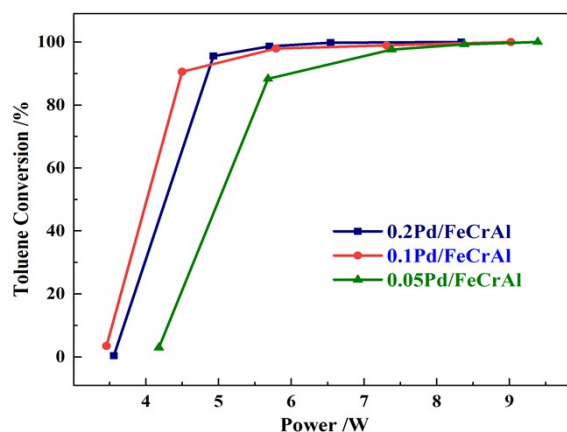

**Supplementary Fig. 7** Effect of Pd loading on the catalytic activities in the combustion of toluene. Condition: toluene concentration of 2500 ppm. WHSV of 10000 mL·h<sup>-1</sup>·g<sup>-1</sup>.

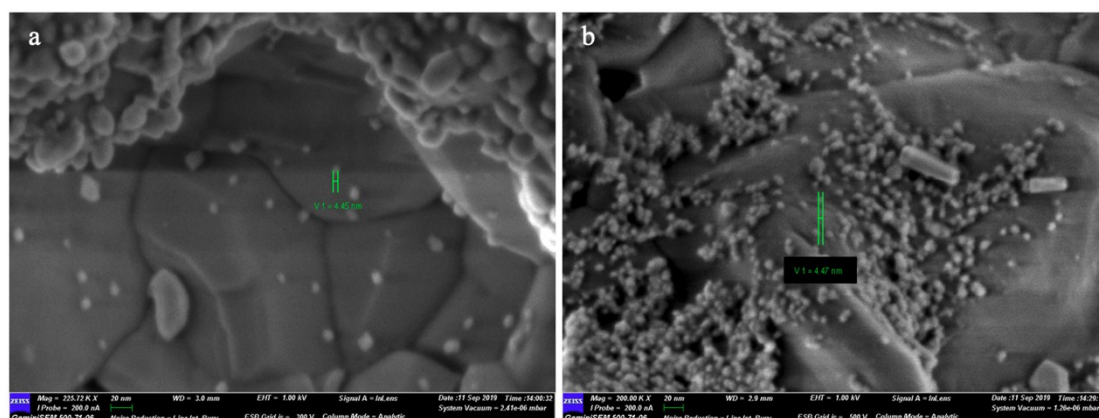

**Supplementary Fig. 8** SEM of (a) 0.1Pd/FeCrAl and (b) 0.1Pt/feCrAl.

It was observed that the catalytic activity increase by the loading of Pd. When Pd loading is 0.05 wt%, and the Pd NPs could not completely cover the FeCrAl metallic substrate, it results to the worse activity. When Pd loading is 0.2 wt%, it will lead to the superposition and accumulation of Pd NPs, causing some active sites to be covered, so there is no obvious increase in catalytic activity. Therefore, the optimal Pd loading is 0.1 wt%.

## References

- 1 Z.B. Rui, C.Y. Chen, Y.B. Lu and H.B. Ji, Chinese J. Chem. Eng., 2014, 22, 882-887.
- 2 B. Grbic, N. Radic and A. Terlecki-Baricevic, Appl. Catal., B, 2004, 50, 161-166.
- 3 N. Burgos, M. Paulis, M.M. Antxustegi and M. Montes, Appl. Catal., B, 2002, 38, 251-258.
- 4 P. Papaefthimiou, T. Ioannides and X.E. Verykios, Appl. Catal., B, 1997, 13, 175-184.
- 5 C.K. Sang, G.S. Wang, Properties and performance of Pd based catalysts for catalytic oxidation of volatile organic compounds, Appl. Catal., B, 2009, 92, 429-436.
- 6 S.Y. Huang, C.B. Zhang and H. He, Catal. Today, 2008, 139, 15-23.
- 7 S.C. Kim, H.Y. Jung, J.W. Nah and Y.K. Park, J. Nanosci. Nanotechno., 2016, 16, 4638-4642.
